# Supplementary material for: Bias in calculating gross nitrification rates in forested catchments using the triple oxygen isotopic composition (Δ 17 O) of stream nitrate
Source: Copernicus journal article supplement (doi:10.5194/bg-21-4717-2024), 2024-11-01
Supplement: Supplementary file 1 [file bg-21-4717-2024-supplement.pdf]

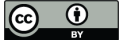

*Supplement of*

**Bias in calculating gross nitrification rates in forested catchments using the triple oxygen isotopic composition ( $\Delta^{17}\text{O}$ ) of stream nitrate**

**Weitian Ding et al.**

*Correspondence to:* Weitian Ding ([dwt530754556@gmail.com](mailto:dwt530754556@gmail.com))

The copyright of individual parts of the supplement might differ from the article licence.

**Table S1.**  $\Delta^{17}\text{O}$  values of  $\text{NO}_3^-$ , leaching flux of  $\text{NO}_3^-$ , total metabolic rate of  $\text{NO}_3^-$  (GDR + uptake), and GNR in the simulated forested soil where the distribution of  $\Delta^{17}\text{O}$  values of  $\text{NO}_3^-$  is heterogeneous.

| Depth<br>layer | $\Delta^{17}\text{O}$<br>‰ | $\text{NO}_3^-$ flux | GDR+uptake | GNR  |
|----------------|----------------------------|----------------------|------------|------|
|                |                            |                      |            |      |
| 0              | 28.0                       | 7.0                  | 0.0        | 0.0  |
| 1              | 25.4                       | 6.6                  | 1.2        | 0.7  |
| 2              | 22.8                       | 6.1                  | 1.2        | 0.7  |
| 3              | 20.2                       | 5.7                  | 1.2        | 0.8  |
| 4              | 17.7                       | 5.2                  | 1.3        | 0.8  |
| 5              | 15.1                       | 4.8                  | 1.3        | 0.9  |
| 6              | 12.5                       | 4.4                  | 1.4        | 1.0  |
| 7              | 9.9                        | 3.9                  | 1.6        | 1.1  |
| 8              | 7.3                        | 3.5                  | 1.8        | 1.4  |
| 9              | 4.7                        | 3.0                  | 2.3        | 1.9  |
| 10             | 2.2                        | 2.6                  | 4.1        | 3.6  |
| 11             | 2.2                        | 2.6                  | 0.0        | 0.0  |
| Total          |                            |                      |            | 13.0 |

**Table S2.**  $\Delta^{17}\text{O}$  values of  $\text{NO}_3^-$ , leaching flux of  $\text{NO}_3^-$ , total metabolic rate of  $\text{NO}_3^-$  (GDR + uptake), and GNR in the simulated forested soil where the distribution of  $\Delta^{17}\text{O}$  values of  $\text{NO}_3^-$  is homogeneous.

| Depth<br>layer | $\Delta^{17}\text{O}$<br>‰ | $\text{NO}_3^-$ flux | GDR+uptake | GNR  |
|----------------|----------------------------|----------------------|------------|------|
|                |                            |                      |            |      |
| 0              | 28.0                       | 7.0                  | 0.0        | 0.0  |
| 1              | 2.2                        | 6.6                  | 84.0       | 83.6 |
| 2              | 2.2                        | 6.1                  | 0.4        | 0.0  |
| 3              | 2.2                        | 5.7                  | 0.4        | 0.0  |
| 4              | 2.2                        | 5.2                  | 0.4        | 0.0  |
| 5              | 2.2                        | 4.8                  | 0.4        | 0.0  |
| 6              | 2.2                        | 4.4                  | 0.4        | 0.0  |
| 7              | 2.2                        | 3.9                  | 0.4        | 0.0  |
| 8              | 2.2                        | 3.5                  | 0.4        | 0.0  |
| 9              | 2.2                        | 3.0                  | 0.4        | 0.0  |
| 10             | 2.2                        | 2.6                  | 0.4        | 0.0  |
| 11             | 2.2                        | 2.6                  | 0.0        | 0.0  |
| Total          |                            |                      |            | 83.6 |

**Table S3.**  $\Delta^{17}\text{O}$  values of  $\text{NO}_3^-$ , leaching flux of  $\text{NO}_3^-$ , total consumption rate of  $\text{NO}_3^-$  (GDR + uptake), and GNR in the simulated forested soil where the distribution of  $\Delta^{17}\text{O}$  values of  $\text{NO}_3^-$  is heterogeneous. While the net nitrification from soil layer 1 to 5 showed positive values, the soil layer 6 to 10 showed negative values.

| Depth<br>layer | $\Delta^{17}\text{O}$<br>‰ | $\text{NO}_3^-$ flux                                         | GDR + uptake | GNR  |
|----------------|----------------------------|--------------------------------------------------------------|--------------|------|
|                |                            | kg of N ha <sup>-1</sup> y <sup>-1</sup> layer <sup>-1</sup> |              |      |
| 0              | 28.0                       | 7.0                                                          | 0.0          | 0.0  |
| 1              | 25.4                       | 7.4                                                          | 0.3          | 0.7  |
| 2              | 22.8                       | 7.9                                                          | 0.4          | 0.8  |
| 3              | 20.2                       | 8.3                                                          | 0.6          | 1.0  |
| 4              | 17.7                       | 8.8                                                          | 0.8          | 1.2  |
| 5              | 15.1                       | 9.2                                                          | 1.1          | 1.5  |
| 6              | 12.5                       | 7.9                                                          | 3.2          | 1.9  |
| 7              | 9.9                        | 6.6                                                          | 3.4          | 2.1  |
| 8              | 7.3                        | 5.2                                                          | 3.6          | 2.3  |
| 9              | 4.7                        | 3.9                                                          | 4.2          | 2.9  |
| 10             | 2.2                        | 2.6                                                          | 6.0          | 4.7  |
| 11             | 2.2                        | 2.6                                                          | 0.0          | 0.0  |
| Total          |                            |                                                              |              | 19.1 |
